# Supplementary material for: Determining Antioxidant Activity of Cannabis Leaves Extracts from Different Varieties—Unveiling Nature’s Treasure Trove
Source: MDPI journal article supplement (doi:10.3390/antiox12071390), 2023-07-06
Supplement: s1 [file s1]

## Supplementary materials

**Table S1.** The results of the antioxidant activity of Białobrzeskie, Henola, and Tygra leaves extracts obtained by ultrasound-assisted extraction (U-A.E) with the use of methanol (MOH), ethanol (EtOH), isopropanol (IOH), presented as mg trolox/g plant material studied in DPPH, ABTS, CUPRAC, and FRAP assays. Means with different superscript letters (a–h) within the same column differ significantly ( $p < 0.05$ )

| Plant material   | Extraction | Extractant | DPPH                                             | ABTS                                             | CUPRAC                                           | FRAP                                             |
|------------------|------------|------------|--------------------------------------------------|--------------------------------------------------|--------------------------------------------------|--------------------------------------------------|
|                  |            |            | Mean $\pm$ SD (mg trolox/ g plant material)      |                                                  |                                                  |                                                  |
| Białobrzeskie L. | U-A.E      | MOH        | <u>10.288 <math>\pm</math> 0.103<sup>g</sup></u> | 9.572 $\pm$ 0.029 <sup>g</sup>                   | <u>22.195 <math>\pm</math> 0.242<sup>h</sup></u> | <u>11.066 <math>\pm</math> 0.048<sup>f</sup></u> |
| Białobrzeskie L. | U-A.E      | EtOH       | 7.932 $\pm$ 0.050 <sup>f</sup>                   | 8.574 $\pm$ 0.008 <sup>d</sup>                   | 11.796 $\pm$ 0.279 <sup>d</sup>                  | 6.925 $\pm$ 0.046 <sup>d</sup>                   |
| Białobrzeskie L. | U-A.E      | IOH        | 7.782 $\pm$ 0.015 <sup>f</sup>                   | 7.837 $\pm$ 0.029 <sup>c</sup>                   | 6.528 $\pm$ 0.123 <sup>b</sup>                   | 3.690 $\pm$ 0.022 <sup>b</sup>                   |
| Tygra L.         | U-A.E      | MOH        | 6.955 $\pm$ 0.023 <sup>e</sup>                   | <u>10.368 <math>\pm</math> 0.035<sup>h</sup></u> | 16.008 $\pm$ 0.140 <sup>g</sup>                  | 10.287 $\pm$ 0.148 <sup>e</sup>                  |
| Tygra L.         | U-A.E      | EtOH       | 4.248 $\pm$ 0.033 <sup>d</sup>                   | 9.176 $\pm$ 0.017 <sup>f</sup>                   | 13.633 $\pm$ 0.014 <sup>f</sup>                  | 6.607 $\pm$ 0.072 <sup>d</sup>                   |
| Tygra L.         | U-A.E      | IOH        | 2.851 $\pm$ 0.027 <sup>b</sup>                   | 8.608 $\pm$ 0.042 <sup>d</sup>                   | 7.706 $\pm$ 0.120 <sup>c</sup>                   | 4.059 $\pm$ 0.015 <sup>c</sup>                   |
| Henola L.        | U-A.E      | MOH        | 4.019 $\pm$ 0.057 <sup>c</sup>                   | 8.839 $\pm$ 0.030 <sup>e</sup>                   | 12.789 $\pm$ 0.049 <sup>e</sup>                  | 6.375 $\pm$ 0.036 <sup>d</sup>                   |
| Henola L.        | U-A.E      | EtOH       | 2.839 $\pm$ 0.021 <sup>b</sup>                   | 7.522 $\pm$ 0.013 <sup>b</sup>                   | 7.333 $\pm$ 0.004 <sup>c</sup>                   | 4.028 $\pm$ 0.032 <sup>c</sup>                   |
| Henola L.        | U-A.E      | IOH        | 2.198 $\pm$ 0.004 <sup>a</sup>                   | 7.202 $\pm$ 0.020 <sup>a</sup>                   | 5.878 $\pm$ 0.058 <sup>a</sup>                   | 3.060 $\pm$ 0.028 <sup>a</sup>                   |

**Table S2.** The results of the antioxidant activity of Białobrzeskie, Henola, and Tygra leaves extracts obtained by maceration with the use of methanol (MOH), ethanol (EtOH), isopropanol (IOH), presented as mg trolox/g plant material studied in DPPH, ABTS, CUPRAC, and FRAP assays. Means with different superscript letters (a–h) within the same column differ significantly ( $p < 0.05$ )

| Plant material   | Extraction | Extractant | DPPH                                            | ABTS                                             | CUPRAC                                           | FRAP                                             |
|------------------|------------|------------|-------------------------------------------------|--------------------------------------------------|--------------------------------------------------|--------------------------------------------------|
|                  |            |            | Mean $\pm$ SD (mg trolox/ g plant material)     |                                                  |                                                  |                                                  |
| Białobrzeskie L. | Maceration | MOH        | <u>5.632 <math>\pm</math> 0.046<sup>g</sup></u> | <u>10.239 <math>\pm</math> 0.105<sup>f</sup></u> | 11.573 $\pm$ 0.147 <sup>e</sup>                  | <u>11.066 <math>\pm</math> 0.048<sup>g</sup></u> |
| Białobrzeskie L. | Maceration | EtOH       | 2.993 $\pm$ 0.027 <sup>b</sup>                  | 9.164 $\pm$ 0.048 <sup>c</sup>                   | 8.698 $\pm$ 0.155 <sup>d</sup>                   | 6.925 $\pm$ 0.046 <sup>e</sup>                   |
| Białobrzeskie L. | Maceration | IOH        | 4.104 $\pm$ 0.040 <sup>e</sup>                  | 9.157 $\pm$ 0.022 <sup>c</sup>                   | 13.729 $\pm$ 0.114 <sup>f</sup>                  | 3.690 $\pm$ 0.022 <sup>a</sup>                   |
| Tygra L.         | Maceration | MOH        | 4.685 $\pm$ 0.092 <sup>f</sup>                  | 10.160 $\pm$ 0.017 <sup>f</sup>                  | 14.392 $\pm$ 0.084 <sup>g</sup>                  | 10.287 $\pm$ 0.148 <sup>f</sup>                  |
| Tygra L.         | Maceration | EtOH       | 3.340 $\pm$ 0.059 <sup>c</sup>                  | 9.526 $\pm$ 0.050 <sup>d</sup>                   | 7.683 $\pm$ 0.116 <sup>c</sup>                   | 6.607 $\pm$ 0.072 <sup>d</sup>                   |
| Tygra L.         | Maceration | IOH        | 3.789 $\pm$ 0.010 <sup>d</sup>                  | 9.880 $\pm$ 0.031 <sup>e</sup>                   | <u>15.766 <math>\pm</math> 0.091<sup>h</sup></u> | 4.059 $\pm$ 0.015 <sup>b</sup>                   |
| Henola L.        | Maceration | MOH        | 4.566 $\pm$ 0.040 <sup>f</sup>                  | 8.662 $\pm$ 0.057 <sup>b</sup>                   | 7.444 $\pm$ 0.137 <sup>c</sup>                   | 4.934 $\pm$ 0.021 <sup>c</sup>                   |
| Henola L.        | Maceration | EtOH       | 2.183 $\pm$ 0.016 <sup>a</sup>                  | 8.082 $\pm$ 0.045 <sup>a</sup>                   | 4.140 $\pm$ 0.147 <sup>a</sup>                   | 3.486 $\pm$ 0.011 <sup>a</sup>                   |
| Henola L.        | Maceration | IOH        | 2.867 $\pm$ 0.019 <sup>b</sup>                  | 8.089 $\pm$ 0.083 <sup>a</sup>                   | 5.628 $\pm$ 0.174 <sup>b</sup>                   | 4.737 $\pm$ 0.008 <sup>c</sup>                   |

**Table S3.** The results of the antioxidant activity of Białobrzeskie, Henola, and Tygra leaves extracts obtained by ultrasound-assisted extraction (U-A.E) with the use of 50:50 (v/v) mixtures of methanol (MOH), ethanol (EtOH), and isopropanol (IOH), presented as mg trolox/g plant material studied in DPPH, ABTS, CUPRAC, and FRAP assays. Means with different superscript letters (a–h) within the same column differ significantly ( $p < 0.05$ )

| Plant material   | Extraction | Extractant | DPPH                                        | ABTS                    | CUPRAC                  | FRAP                 |
|------------------|------------|------------|---------------------------------------------|-------------------------|-------------------------|----------------------|
|                  |            |            | Mean $\pm$ SD (mg trolox/ g plant material) |                         |                         |                      |
| Białobrzeskie L. | U-A.E      | MOH + EtOH | $7.563 \pm 0.075^h$                         | $8.130 \pm 0.097^d$     | $15.992 \pm 0.024^h$    | $10.250 \pm 0.135^h$ |
| Białobrzeskie L. | U-A.E      | EtOH + IOH | $5.600 \pm 0.075^f$                         | $8.303 \pm 0.097^{d,e}$ | $12.437 \pm 0.037^g$    | $8.012 \pm 0.040^f$  |
| Białobrzeskie L. | U-A.E      | MOH + IOH  | $2.815 \pm 0.033^c$                         | $7.564 \pm 0.079^c$     | $6.205 \pm 0.055^b$     | $3.693 \pm 0.031^c$  |
| Tygra L.         | U-A.E      | MOH + EtOH | $6.141 \pm 0.112^g$                         | $8.481 \pm 0.116^e$     | $10.235 \pm 0.012^e$    | $8.942 \pm 0.104^g$  |
| Tygra L.         | U-A.E      | EtOH + IOH | $4.347 \pm 0.084^d$                         | $8.169 \pm 0.025^d$     | $11.789 \pm 0.039^f$    | $5.900 \pm 0.035^e$  |
| Tygra L.         | U-A.E      | MOH + IOH  | $2.526 \pm 0.019^b$                         | $7.611 \pm 0.037^c$     | $6.723 \pm 0.028^d$     | $3.172 \pm 0.017^b$  |
| Henola L.        | U-A.E      | MOH + EtOH | $4.681 \pm 0.055^e$                         | $6.832 \pm 0.120^b$     | $6.553 \pm 0.038^{c,d}$ | $4.165 \pm 0.094^d$  |
| Henola L.        | U-A.E      | EtOH + IOH | $3.034 \pm 0.043^c$                         | $6.983 \pm 0.011^b$     | $6.453 \pm 0.173^{b,c}$ | $4.223 \pm 0.041^d$  |
| Henola L.        | U-A.E      | MOH + IOH  | $2.013 \pm 0.051^a$                         | $6.502 \pm 0.029^a$     | $5.008 \pm 0.062^a$     | $2.272 \pm 0.021^a$  |
